# Supplementary material
Source: HighWire-hosted journal article supplement (https://diabetes.diabetesjournals.org/content/suppl/2005/04/26/54.5.1598)
Supplement: OnlineAppendixPg1598Table3.pdf [file OnlineAppendixPg1598Table3.pdf]

Table 3-suppl Association of PYY and Y2 receptor gene SNPs with severe obesity under logistic regression analysis (online appendix)

| Gene | Genotypes*Group |       |                          |     |    | Logistic regression in additive, dominant, recessive and full models |                  |                  |                       |                  |                  |                        |                  |                  |                  |                  |                  | Total N |
|------|-----------------|-------|--------------------------|-----|----|----------------------------------------------------------------------|------------------|------------------|-----------------------|------------------|------------------|------------------------|------------------|------------------|------------------|------------------|------------------|---------|
|      | SNP No.         | group | Genotype (N of subjects) |     |    | Additive (OR/P value)                                                |                  |                  | Dominant (OR/P value) |                  |                  | Recessive (OR/P value) |                  |                  | Full (P value)   |                  |                  |         |
|      |                 |       | aa                       | ab  | bb | All <sup>a</sup>                                                     | M                | F                | All <sup>a</sup>      | M                | F                | All <sup>a</sup>       | M                | F                | All <sup>a</sup> | M                | F                |         |
| PYY  | 1/2*            | Ncase | 97                       | 185 | 80 | 1.11                                                                 | 1.37             | 0.92             | 1.21                  | 3.59             | 0.50             | 1.08                   | 0.81             | 1.50             | —                | —                | —                | 489     |
|      |                 | Ncntl | 35                       | 61  | 34 | .51                                                                  | .16              | .68              | .44                   | <b>.002</b>      | .08              | .74                    | .52              | .26              | .75              | <b>.001</b>      | <b>.04</b>       |         |
|      | 3               | Ncase | 97                       | 184 | 80 | 1.15                                                                 | 1.36             | 0.98             | 1.25                  | 3.63             | 0.52             | 1.16                   | 0.80             | 1.83             | —                | —                | —                |         |
|      |                 | Ncntl | 33                       | 60  | 31 | .36                                                                  | .16              | .94              | .38                   | <b>.001</b>      | .10              | .53                    | .50              | .12              | .64              | <b>.001</b>      | <b>.02</b>       |         |
| Y2R  | 1               | Ncase | 171                      | 157 | 23 | 0.89                                                                 | 0.80             | 0.98             | 1.23                  | 1.58             | 0.99             | 0.79                   | 0.62             | 0.97             | —                | —                | —                | 476     |
|      |                 | Ncntl | 67                       | 48  | 10 | .50                                                                  | .38              | .92              | .61                   | .54 <sup>b</sup> | 1.0 <sup>b</sup> | .28                    | .14              | .90              | .39              | .16 <sup>b</sup> | 1.0 <sup>b</sup> |         |
|      | 2               | Ncase | 145                      | 167 | 40 | 0.80                                                                 | 0.76             | 0.83             | 0.80                  | 1.10             | 0.56             | 0.74                   | 0.59             | 0.89             | —                | —                | —                |         |
|      |                 | Ncntl | 62                       | 51  | 12 | .17                                                                  | .26              | .42              | .53                   | .84              | .30              | .15                    | .10              | .68              | .36              | .18              | .54              |         |
|      | 3               | Ncase | 81                       | 187 | 81 | 0.81                                                                 | 0.72             | 0.91             | 0.94                  | 0.90             | 0.98             | 0.62                   | 0.45             | 0.81             | —                | —                | —                |         |
|      |                 | Ncntl | 40                       | 54  | 30 | .16                                                                  | .13              | .65              | .80                   | .76              | .96              | <b>.05</b>             | <b>.03</b>       | .50              | .13              | .07              | .79              |         |
|      | 4               | Ncase | 145                      | 166 | 37 | 0.83                                                                 | 0.79             | 0.87             | 0.86                  | 1.21             | 0.60             | 0.77                   | 0.61             | 0.93             | —                | —                | —                |         |
|      |                 | Ncntl | 61                       | 52  | 12 | .27                                                                  | .34              | .54              | .67                   | .71              | .35              | .23                    | .13              | .81              | .49              | .20              | .62              |         |
|      | 5               | Ncase | 140                      | 170 | 36 | 0.84                                                                 | 0.80             | 0.87             | 1.18                  | 1.12             | 1.24             | 0.68                   | 0.63             | 0.72             | —                | —                | —                |         |
|      |                 | Ncntl | 59                       | 47  | 15 | .28                                                                  | .36              | .54              | .62                   | .81              | .64              | .08                    | .16              | .27              | .12              | .29              | .38              |         |
|      | 6               | Ncase | 80                       | 193 | 87 | 0.77                                                                 | 0.75             | 0.80             | 0.90                  | 0.91             | 0.90             | 0.57                   | 0.48             | 0.64             | —                | —                | —                |         |
|      |                 | Ncntl | 42                       | 54  | 31 | .08                                                                  | .17              | .28              | .68                   | .79              | .76              | <b>.02</b>             | <b>.04</b>       | .16              | .05              | .11              | .39              |         |
|      | 7               | Ncase | 80                       | 192 | 89 | 0.77                                                                 | 0.75             | 0.79             | 0.89                  | 0.90             | 0.88             | 0.58                   | 0.50             | 0.64             | —                | —                | —                |         |
|      |                 | Ncntl | 41                       | 54  | 31 | .09                                                                  | .19              | .26              | .63                   | .76              | .71              | <b>.02</b>             | .06              | .16              | .07              | .14              | .39              |         |
|      | 8               | Ncase | 89                       | 188 | 77 | 0.81                                                                 | 0.65             | 1.01             | 0.91                  | 0.76             | 1.09             | 0.66                   | 0.44             | 0.95             | —                | —                | —                |         |
|      |                 | Ncntl | 42                       | 54  | 26 | .18                                                                  | .05              | .96              | .73                   | .46              | .81              | .08                    | <b>.02</b>       | .89              | .20              | .05              | .95              |         |
|      | 9               | Ncase | 342                      | 10  | 0  | 1.24                                                                 | 1.63             | 1.05             | —                     | —                | —                | 1.24                   | 1.63             | 1.05             | —                | —                | —                |         |
|      |                 | Ncntl | 118                      | 4   | 0  | .73                                                                  | .64 <sup>b</sup> | 1.0 <sup>b</sup> | —                     | —                | —                | .73                    | .64 <sup>b</sup> | 1.0 <sup>b</sup> | .94              | .64 <sup>b</sup> | 1.0 <sup>b</sup> |         |
|      | 10              | Ncase | 118                      | 178 | 63 | 0.78                                                                 | 0.59             | 1.00             | 0.94                  | 0.86             | 1.01             | 0.61                   | 0.34             | 0.98             | —                | —                | —                |         |
|      |                 | Ncntl | 57                       | 48  | 22 | .10                                                                  | <b>.02</b>       | .98              | .81                   | .71              | .98              | <b>.02</b>             | <b>.001</b>      | .96              | .06              | <b>.002</b>      | .10              |         |
|      | 11              | Ncase | 118                      | 178 | 63 | 0.78                                                                 | 0.59             | 1.00             | 0.94                  | 0.86             | 1.01             | 0.61                   | 0.34             | 0.98             | —                | —                | —                |         |
|      |                 | Ncntl | 57                       | 48  | 22 | .10                                                                  | <b>.02</b>       | .98              | .81                   | .71              | .98              | <b>.02</b>             | <b>.001</b>      | .96              | .06              | <b>.002</b>      | .10              |         |

Ncase refers to subject number of severe obese group; Ncntl refers to subject number of non-obese control group. OR stands for odds ratio.

P values < 0.05 are bold and italic.

a: P values adjusted for sex. b: Exact P values assessed by Fisher's test due to rare alleles.

\* Information derived from genotyping of SNP2 assumed to be identical to SNP1.
