# Supplementary material
Source: HighWire-hosted journal article supplement (https://diabetes.diabetesjournals.org/content/suppl/2005/04/26/54.5.1598)
Supplement: OnlineAppendixPg1598table4.pdf [file OnlineAppendixPg1598table4.pdf]

Table 4. Positive gender\*genotype interaction in relevant *PYY* and *Y2R* SNPs (online appendix)

|            |         | Men      |    |    |                                                |             |             | Women    |     |    |                                                |      |      | <i>P</i> values for gender* genotype interaction |             |             |
|------------|---------|----------|----|----|------------------------------------------------|-------------|-------------|----------|-----|----|------------------------------------------------|------|------|--------------------------------------------------|-------------|-------------|
|            |         | Genotype |    |    | <i>P</i> values under different genetic models |             |             | Genotype |     |    | <i>P</i> values under different genetic models |      |      |                                                  |             |             |
|            |         | aa       | ab | bb | add                                            | dom         | rec         | aa       | ab  | bb | add                                            | dom  | rec  | add                                              | dom         | rec         |
| <i>PYY</i> | n(case) | 31       | 57 | 12 |                                                |             |             | 66       | 128 | 68 |                                                |      |      |                                                  |             |             |
| SNP1/2     | n(ctrl) | 24       | 21 | 22 | .160                                           | <b>.002</b> | .516        | 11       | 40  | 9  | .679                                           | .077 | .264 | .191                                             | <b>.001</b> | .207        |
| <i>PYY</i> | n(case) | 31       | 56 | 12 |                                                |             |             | 66       | 128 | 68 |                                                |      |      |                                                  |             |             |
| SNP3       | n(ctrl) | 24       | 20 | 22 | .161                                           | <b>.001</b> | .501        | 9        | 40  | 9  | .939                                           | .097 | .120 | .286                                             | <b>.001</b> | .106        |
| <i>Y2R</i> | n(case) | 28       | 51 | 20 |                                                |             |             | 90       | 127 | 43 |                                                |      |      |                                                  |             |             |
| SNP10      | n(ctrl) | 36       | 19 | 12 | .019                                           | .714        | <b>.001</b> | 21       | 29  | 10 | .979                                           | .981 | .955 | .086                                             | .777        | <b>.018</b> |
| <i>Y2R</i> | n(case) | 28       | 51 | 20 |                                                |             |             | 90       | 127 | 43 |                                                |      |      |                                                  |             |             |
| SNP11      | n(ctrl) | 36       | 19 | 12 | .019                                           | .714        | <b>.001</b> | 21       | 29  | 10 | .979                                           | .981 | .955 | .086                                             | .777        | <b>.018</b> |

Case refers to severe obese group. Ctrl refers to non-obese control group. Allele a refers to major allele, and allele b refers to minor allele.

Add stands for additive model, dom dominant model, and rec recessive model.
